# Supplementary material for: How prior preferences determine decision-making frames and biases in the human brain
Source: eLife journal article supplement (doi:10.7554/elife.20317), 2016-11-19
Supplement: supp [file elife-20317-supp-v1.zip]

Archive with 3 entries (3 files):
- elife_poa_e20317_Figure_4_figure_supplement_1.jpg
- elife_poa_e20317_Figure_4_figure_supplement_1.pdf
- elife_poa_e20317_Supplementary_File_1.docx
