# Supplementary figures and images for: How prior preferences determine decision-making frames and biases in the human brain
Source: eLife journal article supplement (doi:10.7554/elife.20317), 2016-11-19

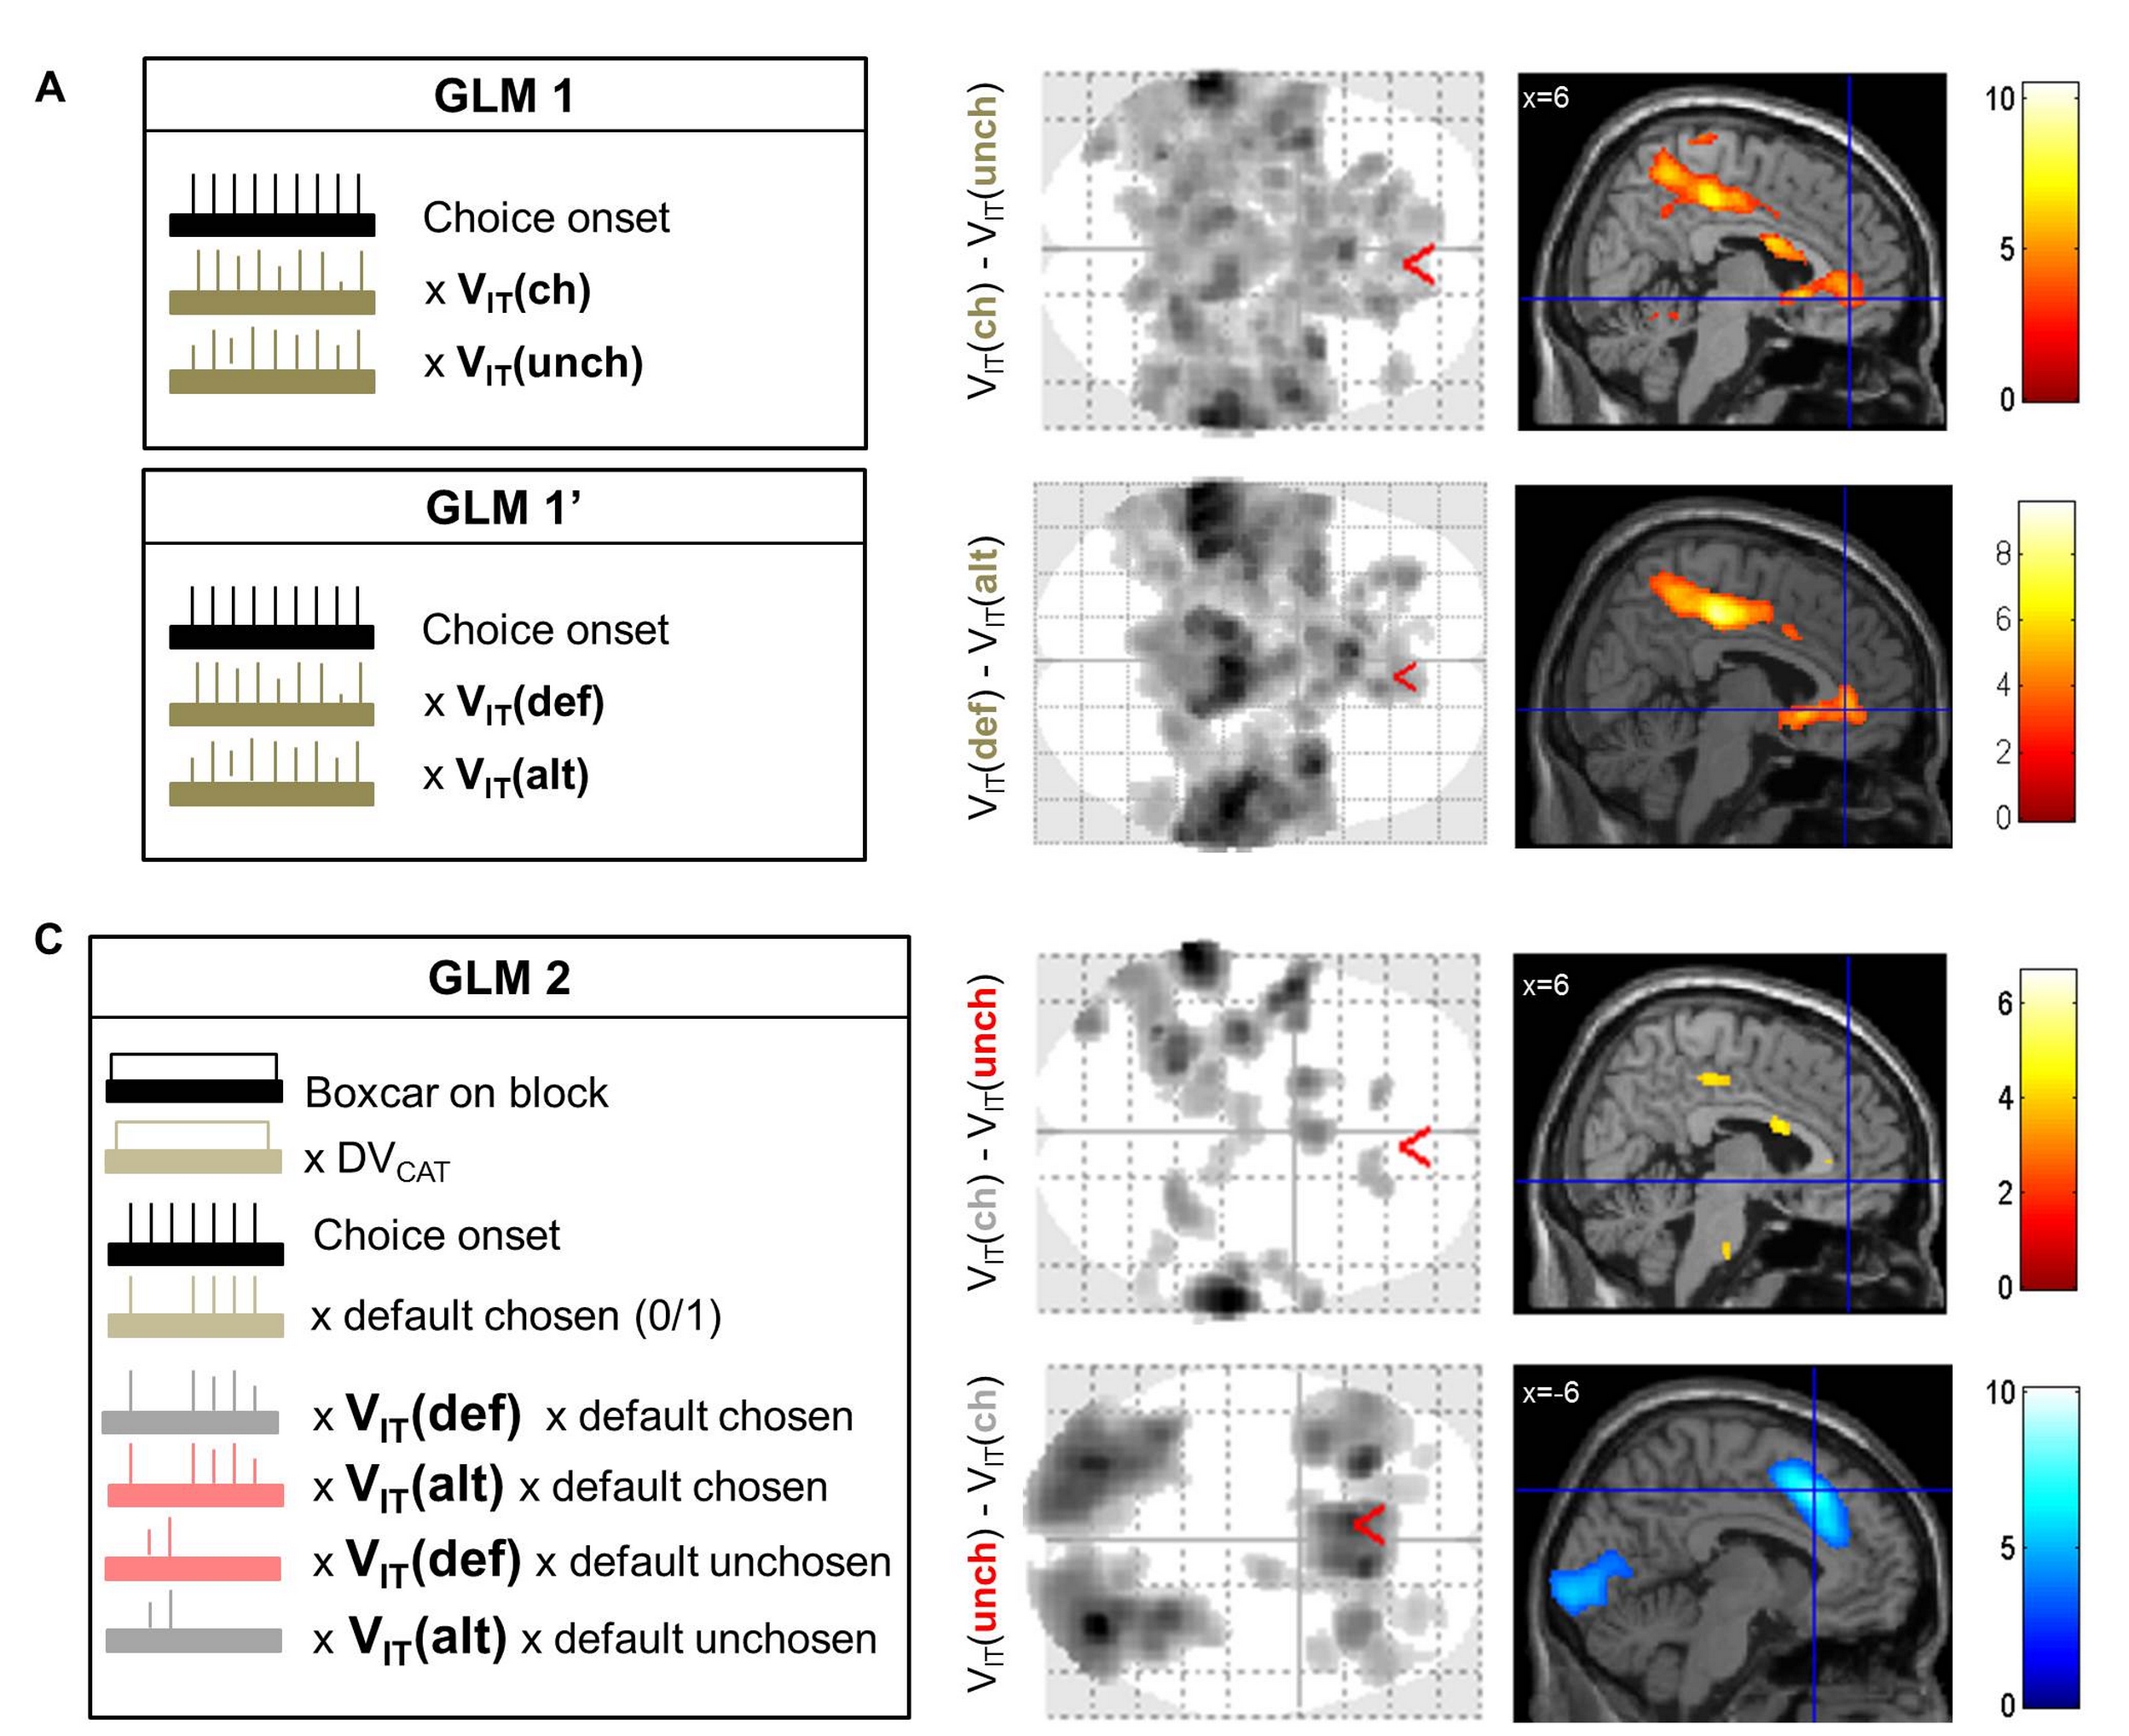

Supplement: supp [file elife-20317-supp-v1.zip › elife_poa_e20317_Figure_4_figure_supplement_1.jpg]
